# Supplementary material for: Plasmid composition in Aeromonas salmonicida subsp. salmonicida 01-B526 unravels unsuspected type three secretion system loss patterns
Source: PubMed Central journal article supplement (PMC5508783; doi:10.1186/s12864-017-3921-1), 2017-07-12

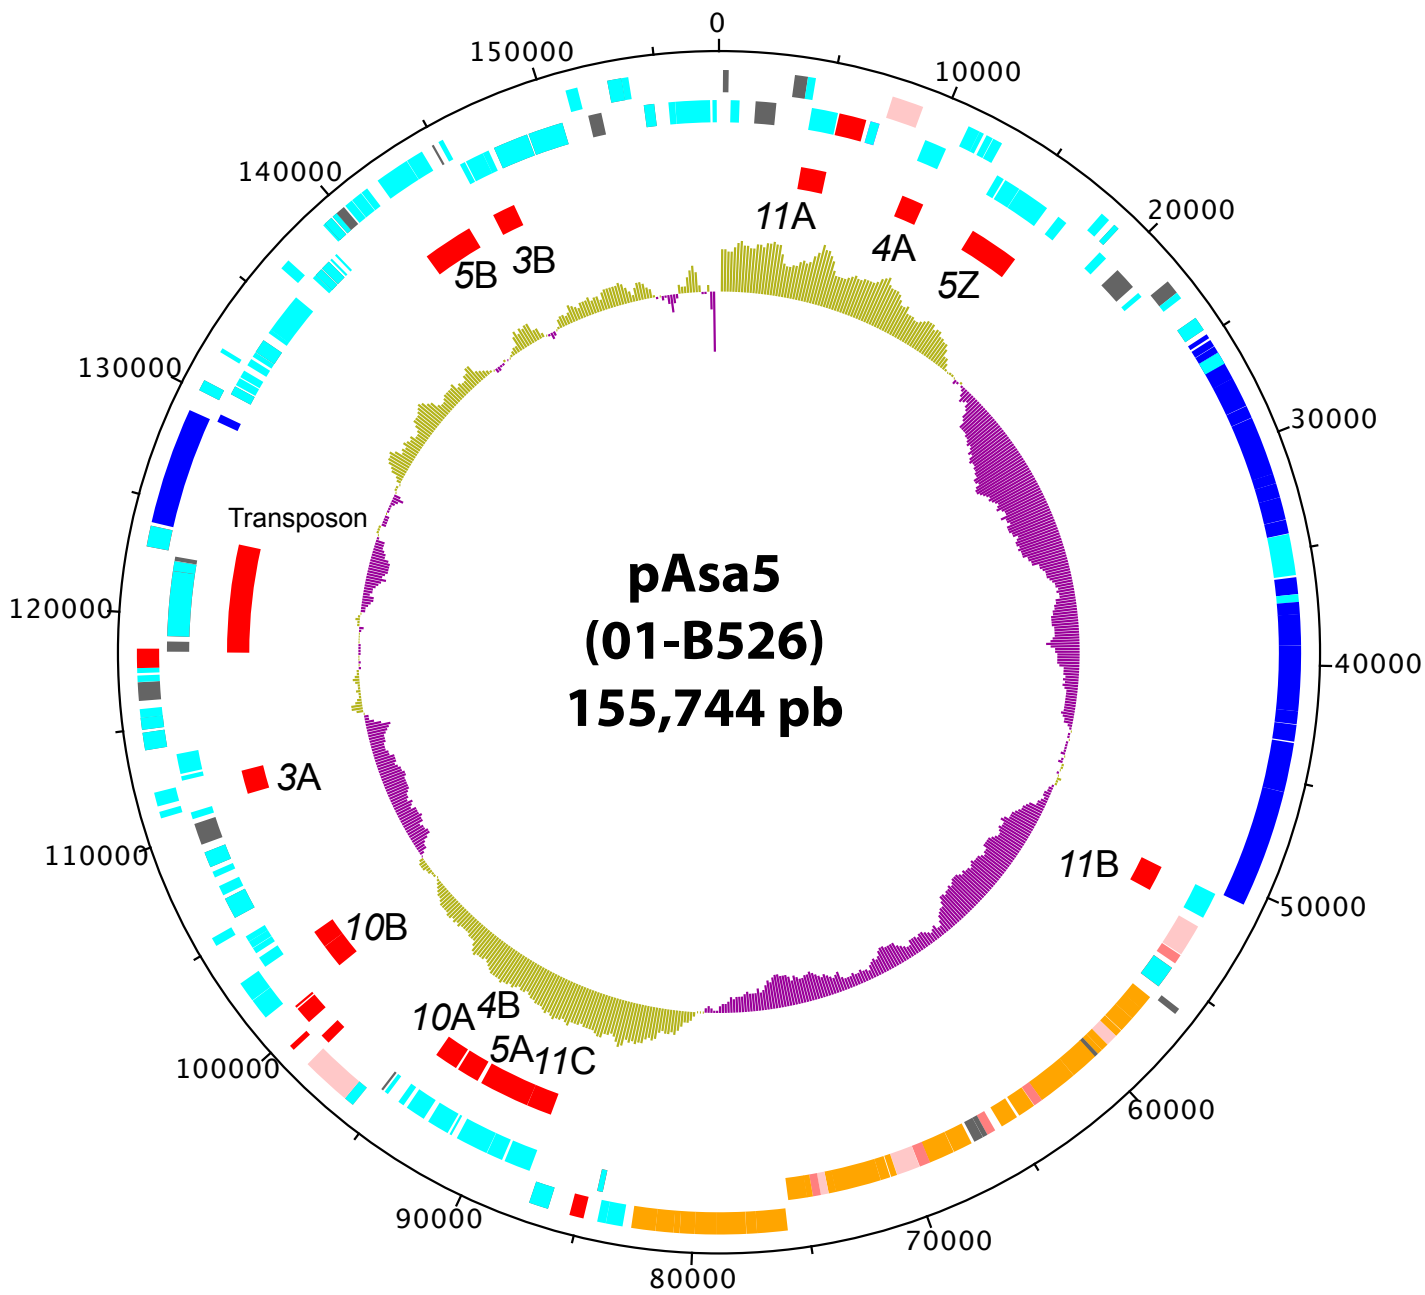

Supplement: 12864_2017_3921_MOESM1_ESM.pdf [file 12864_2017_3921_MOESM1_ESM.pdf]
